Innovar is effective in preventing increases in intracranial pressure during maintenance of anesthesia, and currently is considered by many to be the best anesthetic for patients with space-occupying lesions. At the same time, halothane has lost favor and is commonly believed to be contraindicated for such patients. It is our conclusion that, if hypocapnia is established initially, halothane is not contraindicated in patients with intracranial mass lesions, and in some circumstances it may be the most appropriate anesthetic available.

### References

- McDowall DC, Barker J, Jennett WB: Cerebrospinal fluid pressure measurements during anaesthesia. *Anaesthesia* 21:189-201, 1966
- McDowall DC, Barker J, Jennett WB: Cerebrospinal fluid pressure measurements during anaesthesia. *Anaesthesia* 21:98-99, 1966
- Jennett WB, McDowall DC, Barker J: The effect of halothane on intracranial pressure in cerebral tumors: Report of two cases. *J Neurosurg* 26:270-274, 1967
- Jennett WB, Barker J, Fitch W, et al: Effect of anaesthesia on intracranial pressure in patients with space-occupying lesions. *Lancet* 1:61-64, 1969
- Editorial: Halothane and neurosurgery. *Br J Anaesth* 41:277-278, 1969
- Fitch W, Barker J, Jennett WB, et al: The influence of neuroleptanalgesic drugs on cerebrospinal fluid pressure. *Br J Anaesth* 41:800-806, 1969
- Marx GF, Andrews IC, Orkin LR: Cerebrospinal fluid pressures during halothane anaesthesia. *Can Anaesth Soc J* 9:239-245, 1962
- Wollman H, Alexander SC, Cohen PJ, et al: Cerebral circulation of man during halothane anaesthesia: Effects of hypocarbia and d-tubocurarine. *ANESTHESIOLOGY* 25:180-184, 1964
- Christensen MS, Høedt-Rasmussen K, Lassen NA: Cerebral vasodilation by halothane anaesthesia in man and its potentiation by hypotension and hypercapnia. *Br J Anaesth* 39:927-934, 1967
- Rich M, Scheinberg P, Belle MS: Relationship between cerebrospinal fluid pressure changes and cerebral blood flow. *Circ Res* 1:389-395, 1953
- Risberg J, Lundberg N, Ingvar DH: Regional cerebral blood volume during acute transient rises of the intracranial pressure (plateau waves). *J Neurosurg* 31:303-310, 1969
- Smith AL, Neufeld CR, Ominsky AJ, et al: Effect of arterial CO<sub>2</sub> tension on cerebral blood flow, mean transit time, and vascular volume. *J Appl Physiol* 31:701-707, 1971
- Alexander SC, Wollman H, Cohen PJ, et al: Cerebrovascular response to P<sub>aCO<sub>2</sub></sub> during halothane anaesthesia in man. *J Appl Physiol* 19:561-565, 1964
- Zwetnow N, Kjällquist A, Siesjö BK: Cerebral blood flow during intracranial hypertension related to tissue hypoxia and to acidosis in cerebral extracellular fluids. *Progr Brain Res* 30:87-92, 1968
- Stephen CR, Woodhall B, Golden JB, et al: The influence of anesthetic drugs and techniques on intracranial tension. *ANESTHESIOLOGY* 15:365-377, 1954

### Respiration

**NEBULIZATION IN PULMONARY DISEASE** Ultrasonically nebulized mist, with a median particle diameter of  $5.0 \pm 1.6 \mu\text{m}$  and a mist density of about 50 mg H<sub>2</sub>O/l air, was administered by mist tent for 15 minutes to 20 normal children, 20 children with cystic fibrosis, and 20 children with bronchial asthma. No child was given any bronchodilator drug or showed any acute exacerbation of pulmonary disease on the day of testing. Half of each group inhaled orally and half, nasally. Maximum expiratory flow volume curves were made using a wedge spirometer; airway resistance and thoracic gas volume were measured by body plethysmography. Forced expiratory flow (FEV), maximum ex-

piratory flow ( $V_{\text{max}}$ ), expiratory flow at 25 and 50 per cent of vital capacity ( $V_{25}$  and  $V_{50}$ ) and specific airway resistance ( $sR_{\text{aw}}$ ) were calculated. The normal children showed a slight but significant decrease in  $sR_{\text{aw}}$  when breathing mist nasally. Children with cystic fibrosis showed no significant change in any measurement after inhalation of mist. Asthmatic children showed a significant increase in  $sR_{\text{aw}}$  and significant decreases in all flow measurements and in forced vital capacity. The last measurement suggested air trapping. (Barker, R., and Levison, H.: *Effects of Ultrasonically Nebulized Distilled Water on Airway Dynamics in Children with Cystic Fibrosis and Asthma, Pediatrics* 80: 396-400, 1972.)
